# Supplementary material for: Protected N-heterocyclic carbenes as latent pre-catalysts for the polymerization of ε-caprolactone
Source: Royal Society of Chemistry journal article supplement (doi:10.1039/c3py00548h), 2013-01-01
Supplement: c3py00548h.pdf [file c3py00548h.pdf]

## Supporting Information to

# Protected N-Heterocyclic Carbenes as Latent Pre-Catalysts for the Polymerization of $\epsilon$ -Caprolactone

Stefan Naumann, Friedrich Georg Schmidt, Wolfgang Frey and Michael R. Buchmeiser\*

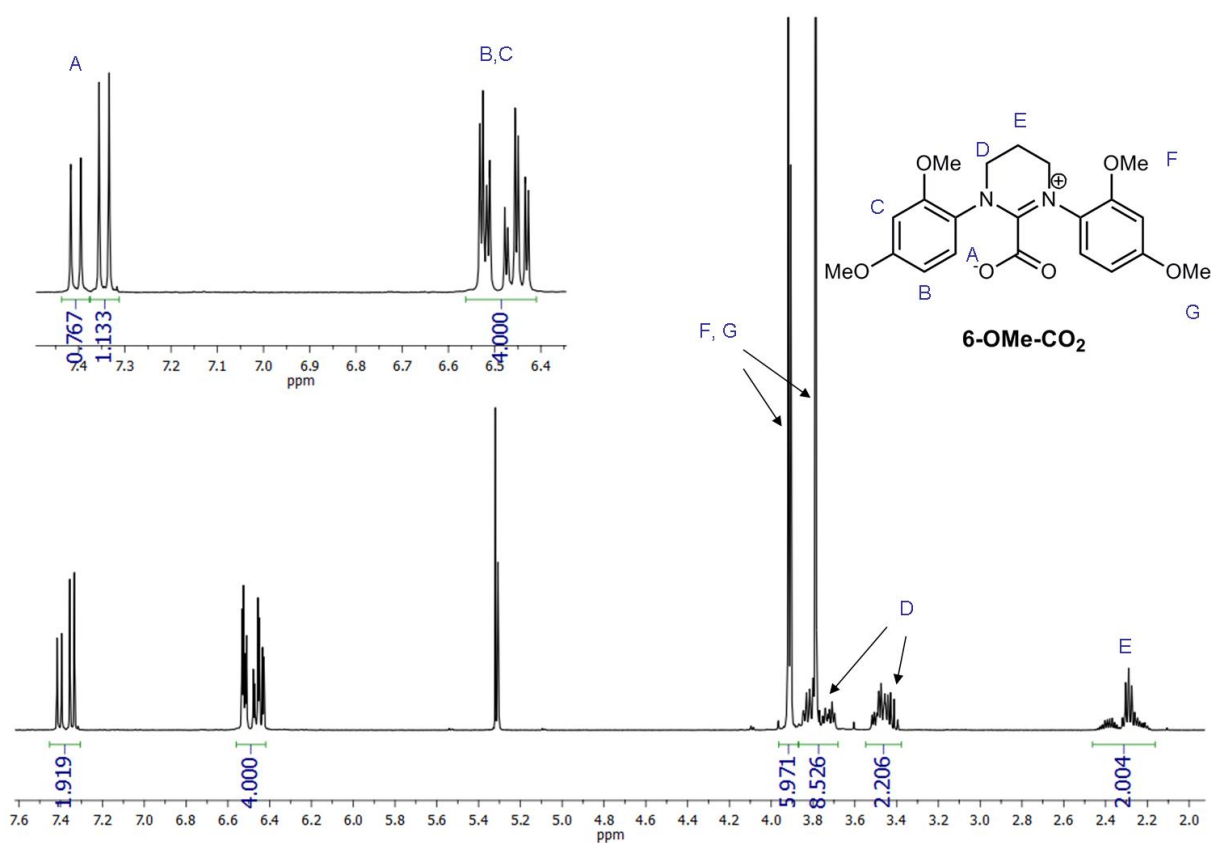

Figure S1.  $^1\text{H-NMR}$  of 6-OMe-CO<sub>2</sub> (CD<sub>2</sub>Cl<sub>2</sub>, RT).

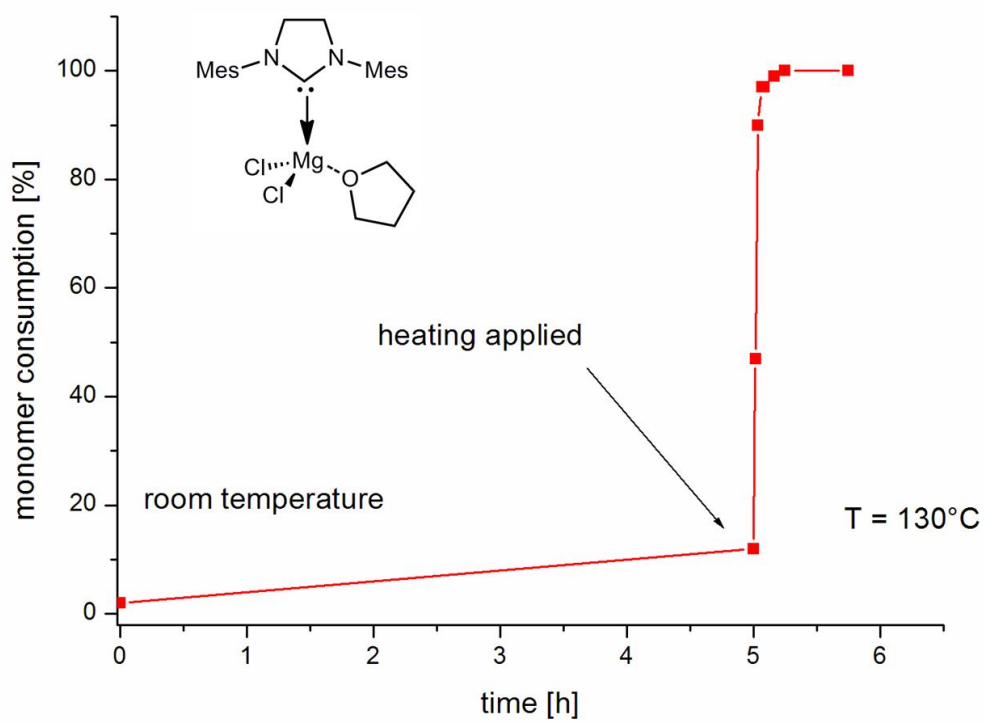

**Figure S2:** Latent behavior of **5s-Mes-MgCl<sub>2</sub>** at room temperature and following treatment at 130°C.

[NHC]:[Bn-OH]:[ε-CL] = 1:2:280.

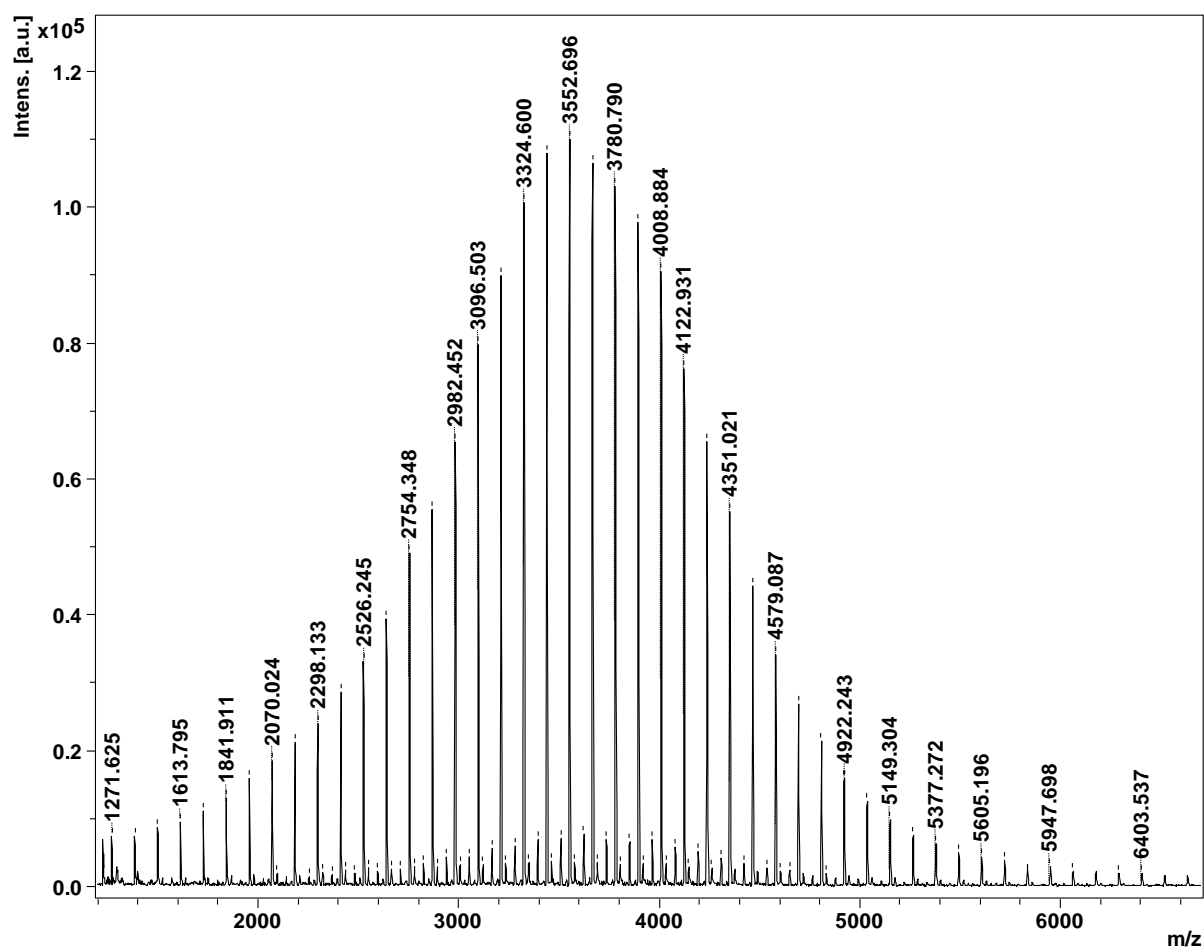

**Figure S3.** MALDI-TOF of PCL by the action of **5s-tBu-CO<sub>2</sub>/Bn-OH** at 70°C. Found: Rep. unit 114.068, end1 107.050, end2 1.00783, cation 22.9898,  $M_n$  3396.86,  $M_w$  3561.55, pd 1.04848, DP 29.78, resid. -0.31296.

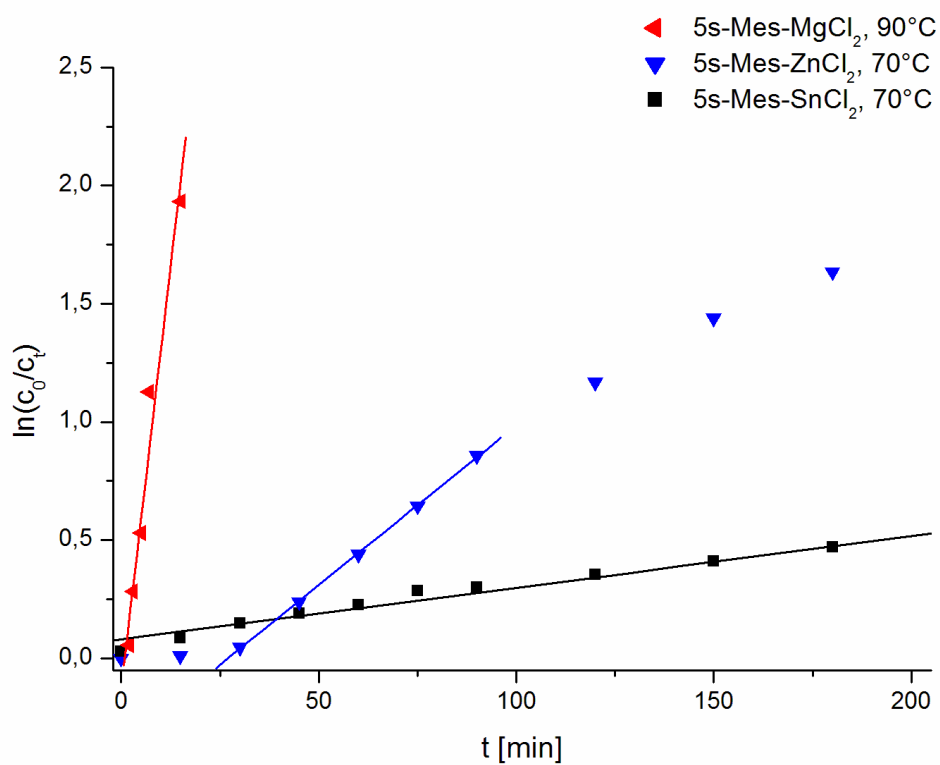

**Figure S4:** Plot of  $\ln(c_0/c_t)$  vs. time. At high conversions, deviations from the linear behavior occur (blue triangles; omitted for the red triangles). **5s-Mes-ZnCl<sub>2</sub>** shows a distinct induction period.  $[\text{NHC}]:[\text{Bn-OH}]:[\epsilon\text{-CL}] = 1:2:280$ .

**Table S1.** Crystal data and structure refinement for **5s-Mes-ZnCl<sub>2</sub>**.

|                                   |                                                                                                           |
|-----------------------------------|-----------------------------------------------------------------------------------------------------------|
| Empirical formula                 | C <sub>27</sub> H <sub>38</sub> Cl <sub>2</sub> N <sub>2</sub> O <sub>1.50</sub> Zn                       |
| Formula weight                    | 550.86                                                                                                    |
| Temperature                       | 100(2) K                                                                                                  |
| Wavelength                        | 0.71073 Å                                                                                                 |
| Crystal system, space group       | Monoclinic, C 2/c                                                                                         |
| Unit cell dimensions              | a = 29.535(4) Å alpha = 90 °.<br>b = 11.9480(14) Å beta = 96.899(7) °.<br>c = 15.3350(17) Å gamma = 90 °. |
| Volume                            | 5372.3(11) Å <sup>3</sup>                                                                                 |
| Z, Calculated density             | 8, 1.362 g/cm <sup>3</sup>                                                                                |
| Absorption coefficient            | 1.137 mm <sup>-1</sup>                                                                                    |
| F(000)                            | 2320                                                                                                      |
| Crystal size                      | 0.36 x 0.11 x 0.06 mm                                                                                     |
| Θ range for data collection       | 1.84 to 26.43 °.                                                                                          |
| Limiting indices                  | -36<=h<=25, -14<=k<=13, -19<=l<=19                                                                        |
| Reflections collected / unique    | 19082 / 5360 [R(int) = 0.0733]                                                                            |
| Completeness to Θ = 26.43         | 97.2 %                                                                                                    |
| Absorption correction             | Numerical                                                                                                 |
| Max. and min. transmission        | 0.9859 and 0.8765                                                                                         |
| Refinement method                 | Full-matrix least-squares on F <sup>2</sup>                                                               |
| Data / restraints / parameters    | 5360 / 0 / 309                                                                                            |
| Goodness-of-fit on F <sup>2</sup> | 1.014                                                                                                     |
| Final R indices [I>2σ(I)]         | R1 = 0.0481, wR2 = 0.0639                                                                                 |
| R indices (all data)              | R1 = 0.1076, wR2 = 0.0710                                                                                 |
| Largest diff. peak and hole       | 0.421 and -0.385 e.Å <sup>-3</sup>                                                                        |

**Table S2.** Atomic coordinates ( $\times 10^4$ ) and equivalent isotropic displacement parameters ( $\text{Å}^2 \times 10^3$ ) for **5s-Mes-ZnCl<sub>2</sub>**. U(eq) is defined as one third of the trace of the orthogonalized  $U_{ij}$  tensor.

|       | x       | y        | z       | U(eq) |
|-------|---------|----------|---------|-------|
| Zn(1) | 1460(1) | 3523(1)  | 875(1)  | 14(1) |
| Cl(1) | 2021(1) | 4425(1)  | 298(1)  | 24(1) |
| Cl(2) | 887(1)  | 3050(1)  | -148(1) | 21(1) |
| N(1)  | 1287(1) | 3590(2)  | 2807(1) | 12(1) |
| C(1)  | 1269(1) | 4112(2)  | 2024(2) | 12(1) |
| N(2)  | 1117(1) | 5145(2)  | 2123(1) | 12(1) |
| C(2)  | 1098(1) | 4275(2)  | 3482(2) | 16(1) |
| C(3)  | 1045(1) | 5415(2)  | 3038(2) | 16(1) |
| C(4)  | 1347(1) | 2401(2)  | 2921(2) | 11(1) |
| C(5)  | 1016(1) | 1685(2)  | 2509(2) | 13(1) |
| C(6)  | 1095(1) | 540(3)   | 2591(2) | 17(1) |
| C(7)  | 1474(1) | 105(2)   | 3091(2) | 16(1) |
| C(8)  | 1785(1) | 846(2)   | 3536(2) | 16(1) |
| C(9)  | 1725(1) | 2002(2)  | 3455(2) | 13(1) |
| C(10) | 581(1)  | 2102(2)  | 1997(2) | 20(1) |
| C(11) | 1545(1) | -1145(2) | 3163(2) | 23(1) |
| C(12) | 2070(1) | 2791(2)  | 3929(2) | 21(1) |
| C(13) | 1009(1) | 5967(2)  | 1437(2) | 12(1) |
| C(14) | 1334(1) | 6752(2)  | 1264(2) | 13(1) |
| C(15) | 1200(1) | 7588(2)  | 656(2)  | 15(1) |
| C(16) | 761(1)  | 7666(2)  | 240(2)  | 15(1) |
| C(17) | 447(1)  | 6855(2)  | 420(2)  | 14(1) |
| C(18) | 564(1)  | 5995(2)  | 1016(2) | 12(1) |
| C(19) | 1812(1) | 6704(2)  | 1725(2) | 20(1) |
| C(20) | 617(1)  | 8628(2)  | -374(2) | 24(1) |
| C(21) | 219(1)  | 5125(2)  | 1191(2) | 17(1) |
| O(1)  | 1790(1) | 1990(2)  | 1154(1) | 14(1) |
| C(22) | 2267(1) | 1948(2)  | 1490(2) | 21(1) |
| C(23) | 2382(1) | 717(2)   | 1614(2) | 18(1) |
| C(24) | 1999(1) | 113(2)   | 1034(2) | 20(1) |
| C(25) | 1720(1) | 1042(2)  | 576(2)  | 28(1) |
| O(1S) | 0       | -298(2)  | 2500    | 30(1) |
| C(1S) | -168(1) | -993(3)  | 1772(2) | 28(1) |
| C(2S) | -200(1) | -2159(2) | 2144(2) | 18(1) |

**Table S3.** Bond lengths [Å] and angles [°] for **5s-Mes-ZnCl<sub>2</sub>**.

---

|              |            |
|--------------|------------|
| Zn(1)-C(1)   | 2.040(3)   |
| Zn(1)-O(1)   | 2.0955(19) |
| Zn(1)-Cl(2)  | 2.2381(9)  |
| Zn(1)-Cl(1)  | 2.2451(9)  |
| N(1)-C(1)    | 1.347(3)   |
| N(1)-C(4)    | 1.440(4)   |
| N(1)-C(2)    | 1.481(3)   |
| C(1)-N(2)    | 1.328(3)   |
| N(2)-C(13)   | 1.447(3)   |
| N(2)-C(3)    | 1.480(3)   |
| C(2)-C(3)    | 1.522(4)   |
| C(2)-H(2A)   | 0.9900     |
| C(2)-H(2B)   | 0.9900     |
| C(3)-H(3A)   | 0.9900     |
| C(3)-H(3B)   | 0.9900     |
| C(4)-C(9)    | 1.389(4)   |
| C(4)-C(5)    | 1.392(4)   |
| C(5)-C(6)    | 1.391(4)   |
| C(5)-C(10)   | 1.506(4)   |
| C(6)-C(7)    | 1.378(4)   |
| C(6)-H(6)    | 0.9500     |
| C(7)-C(8)    | 1.394(4)   |
| C(7)-C(11)   | 1.511(4)   |
| C(8)-C(9)    | 1.396(4)   |
| C(8)-H(8)    | 0.9500     |
| C(9)-C(12)   | 1.509(4)   |
| C(10)-H(10A) | 0.9800     |
| C(10)-H(10B) | 0.9800     |
| C(10)-H(10C) | 0.9800     |
| C(11)-H(11A) | 0.9800     |
| C(11)-H(11B) | 0.9800     |
| C(11)-H(11C) | 0.9800     |
| C(12)-H(12A) | 0.9800     |
| C(12)-H(12B) | 0.9800     |
| C(12)-H(12C) | 0.9800     |
| C(13)-C(14)  | 1.390(4)   |
| C(13)-C(18)  | 1.392(4)   |
| C(14)-C(15)  | 1.391(4)   |
| C(14)-C(19)  | 1.503(4)   |
| C(15)-C(16)  | 1.377(4)   |
| C(15)-H(15)  | 0.9500     |
| C(16)-C(17)  | 1.392(4)   |
| C(16)-C(20)  | 1.514(4)   |
| C(17)-C(18)  | 1.390(4)   |
| C(17)-H(17)  | 0.9500     |
| C(18)-C(21)  | 1.502(4)   |
| C(19)-H(19A) | 0.9800     |
| C(19)-H(19B) | 0.9800     |
| C(19)-H(19C) | 0.9800     |
| C(20)-H(20A) | 0.9800     |
| C(20)-H(20B) | 0.9800     |
| C(20)-H(20C) | 0.9800     |
| C(21)-H(21A) | 0.9800     |

|                   |            |
|-------------------|------------|
| C(21)-H(21B)      | 0.9800     |
| C(21)-H(21C)      | 0.9800     |
| O(1)-C(25)        | 1.437(3)   |
| O(1)-C(22)        | 1.440(3)   |
| C(22)-C(23)       | 1.517(4)   |
| C(22)-H(22A)      | 0.9900     |
| C(22)-H(22B)      | 0.9900     |
| C(23)-C(24)       | 1.532(4)   |
| C(23)-H(23A)      | 0.9900     |
| C(23)-H(23B)      | 0.9900     |
| C(24)-C(25)       | 1.506(4)   |
| C(24)-H(24A)      | 0.9900     |
| C(24)-H(24B)      | 0.9900     |
| C(25)-H(25A)      | 0.9900     |
| C(25)-H(25B)      | 0.9900     |
| O(1S)-C(1S)       | 1.432(3)   |
| O(1S)-C(1S)#1     | 1.432(3)   |
| C(1S)-C(2S)       | 1.512(4)   |
| C(1S)-H(1S1)      | 0.9900     |
| C(1S)-H(1S2)      | 0.9900     |
| C(2S)-C(2S)#1     | 1.511(6)   |
| C(2S)-H(2S1)      | 0.9900     |
| C(2S)-H(2S2)      | 0.9900     |
|                   |            |
| C(1)-Zn(1)-O(1)   | 107.18(9)  |
| C(1)-Zn(1)-Cl(2)  | 115.36(9)  |
| O(1)-Zn(1)-Cl(2)  | 102.52(6)  |
| C(1)-Zn(1)-Cl(1)  | 117.99(8)  |
| O(1)-Zn(1)-Cl(1)  | 98.80(6)   |
| Cl(2)-Zn(1)-Cl(1) | 112.10(3)  |
| C(1)-N(1)-C(4)    | 123.8(2)   |
| C(1)-N(1)-C(2)    | 112.9(2)   |
| C(4)-N(1)-C(2)    | 120.7(2)   |
| N(2)-C(1)-N(1)    | 107.8(2)   |
| N(2)-C(1)-Zn(1)   | 123.47(19) |
| N(1)-C(1)-Zn(1)   | 128.6(2)   |
| C(1)-N(2)-C(13)   | 126.6(2)   |
| C(1)-N(2)-C(3)    | 113.6(2)   |
| C(13)-N(2)-C(3)   | 119.8(2)   |
| N(1)-C(2)-C(3)    | 102.1(2)   |
| N(1)-C(2)-H(2A)   | 111.4      |
| C(3)-C(2)-H(2A)   | 111.4      |
| N(1)-C(2)-H(2B)   | 111.4      |
| C(3)-C(2)-H(2B)   | 111.4      |
| H(2A)-C(2)-H(2B)  | 109.2      |
| N(2)-C(3)-C(2)    | 102.1(2)   |
| N(2)-C(3)-H(3A)   | 111.3      |
| C(2)-C(3)-H(3A)   | 111.3      |
| N(2)-C(3)-H(3B)   | 111.3      |
| C(2)-C(3)-H(3B)   | 111.3      |
| H(3A)-C(3)-H(3B)  | 109.2      |
| C(9)-C(4)-C(5)    | 121.9(3)   |
| C(9)-C(4)-N(1)    | 119.2(3)   |
| C(5)-C(4)-N(1)    | 118.9(3)   |
| C(6)-C(5)-C(4)    | 117.5(3)   |
| C(6)-C(5)-C(10)   | 119.8(3)   |



|                     |          |
|---------------------|----------|
| C(4)-C(5)-C(10)     | 122.7(3) |
| C(7)-C(6)-C(5)      | 122.5(3) |
| C(7)-C(6)-H(6)      | 118.7    |
| C(5)-C(6)-H(6)      | 118.7    |
| C(6)-C(7)-C(8)      | 118.4(3) |
| C(6)-C(7)-C(11)     | 120.6(3) |
| C(8)-C(7)-C(11)     | 121.0(3) |
| C(7)-C(8)-C(9)      | 121.1(3) |
| C(7)-C(8)-H(8)      | 119.4    |
| C(9)-C(8)-H(8)      | 119.4    |
| C(4)-C(9)-C(8)      | 118.4(3) |
| C(4)-C(9)-C(12)     | 121.3(3) |
| C(8)-C(9)-C(12)     | 120.3(3) |
| C(5)-C(10)-H(10A)   | 109.5    |
| C(5)-C(10)-H(10B)   | 109.5    |
| H(10A)-C(10)-H(10B) | 109.5    |
| C(5)-C(10)-H(10C)   | 109.5    |
| H(10A)-C(10)-H(10C) | 109.5    |
| H(10B)-C(10)-H(10C) | 109.5    |
| C(7)-C(11)-H(11A)   | 109.5    |
| C(7)-C(11)-H(11B)   | 109.5    |
| H(11A)-C(11)-H(11B) | 109.5    |
| C(7)-C(11)-H(11C)   | 109.5    |
| H(11A)-C(11)-H(11C) | 109.5    |
| H(11B)-C(11)-H(11C) | 109.5    |
| C(9)-C(12)-H(12A)   | 109.5    |
| C(9)-C(12)-H(12B)   | 109.5    |
| H(12A)-C(12)-H(12B) | 109.5    |
| C(9)-C(12)-H(12C)   | 109.5    |
| H(12A)-C(12)-H(12C) | 109.5    |
| H(12B)-C(12)-H(12C) | 109.5    |
| C(14)-C(13)-C(18)   | 121.9(3) |
| C(14)-C(13)-N(2)    | 120.0(3) |
| C(18)-C(13)-N(2)    | 117.9(3) |
| C(13)-C(14)-C(15)   | 117.8(3) |
| C(13)-C(14)-C(19)   | 121.0(3) |
| C(15)-C(14)-C(19)   | 121.2(3) |
| C(16)-C(15)-C(14)   | 122.3(3) |
| C(16)-C(15)-H(15)   | 118.8    |
| C(14)-C(15)-H(15)   | 118.8    |
| C(15)-C(16)-C(17)   | 118.3(3) |
| C(15)-C(16)-C(20)   | 121.2(3) |
| C(17)-C(16)-C(20)   | 120.4(3) |
| C(18)-C(17)-C(16)   | 121.7(3) |
| C(18)-C(17)-H(17)   | 119.2    |
| C(16)-C(17)-H(17)   | 119.2    |
| C(17)-C(18)-C(13)   | 118.0(3) |
| C(17)-C(18)-C(21)   | 120.5(3) |
| C(13)-C(18)-C(21)   | 121.5(3) |
| C(14)-C(19)-H(19A)  | 109.5    |
| C(14)-C(19)-H(19B)  | 109.5    |
| H(19A)-C(19)-H(19B) | 109.5    |
| C(14)-C(19)-H(19C)  | 109.5    |
| H(19A)-C(19)-H(19C) | 109.5    |
| H(19B)-C(19)-H(19C) | 109.5    |
| C(16)-C(20)-H(20A)  | 109.5    |

|                      |            |
|----------------------|------------|
| C(16)-C(20)-H(20B)   | 109.5      |
| H(20A)-C(20)-H(20B)  | 109.5      |
| C(16)-C(20)-H(20C)   | 109.5      |
| H(20A)-C(20)-H(20C)  | 109.5      |
| H(20B)-C(20)-H(20C)  | 109.5      |
| C(18)-C(21)-H(21A)   | 109.5      |
| C(18)-C(21)-H(21B)   | 109.5      |
| H(21A)-C(21)-H(21B)  | 109.5      |
| C(18)-C(21)-H(21C)   | 109.5      |
| H(21A)-C(21)-H(21C)  | 109.5      |
| H(21B)-C(21)-H(21C)  | 109.5      |
| C(25)-O(1)-C(22)     | 104.9(2)   |
| C(25)-O(1)-Zn(1)     | 122.21(17) |
| C(22)-O(1)-Zn(1)     | 120.92(16) |
| O(1)-C(22)-C(23)     | 105.8(2)   |
| O(1)-C(22)-H(22A)    | 110.6      |
| C(23)-C(22)-H(22A)   | 110.6      |
| O(1)-C(22)-H(22B)    | 110.6      |
| C(23)-C(22)-H(22B)   | 110.6      |
| H(22A)-C(22)-H(22B)  | 108.7      |
| C(22)-C(23)-C(24)    | 104.2(2)   |
| C(22)-C(23)-H(23A)   | 110.9      |
| C(24)-C(23)-H(23A)   | 110.9      |
| C(22)-C(23)-H(23B)   | 110.9      |
| C(24)-C(23)-H(23B)   | 110.9      |
| H(23A)-C(23)-H(23B)  | 108.9      |
| C(25)-C(24)-C(23)    | 104.3(2)   |
| C(25)-C(24)-H(24A)   | 110.9      |
| C(23)-C(24)-H(24A)   | 110.9      |
| C(25)-C(24)-H(24B)   | 110.9      |
| C(23)-C(24)-H(24B)   | 110.9      |
| H(24A)-C(24)-H(24B)  | 108.9      |
| O(1)-C(25)-C(24)     | 105.2(2)   |
| O(1)-C(25)-H(25A)    | 110.7      |
| C(24)-C(25)-H(25A)   | 110.7      |
| O(1)-C(25)-H(25B)    | 110.7      |
| C(24)-C(25)-H(25B)   | 110.7      |
| H(25A)-C(25)-H(25B)  | 108.8      |
| C(1S)-O(1S)-C(1S)#1  | 109.0(3)   |
| O(1S)-C(1S)-C(2S)    | 105.8(2)   |
| O(1S)-C(1S)-H(1S1)   | 110.6      |
| C(2S)-C(1S)-H(1S1)   | 110.6      |
| O(1S)-C(1S)-H(1S2)   | 110.6      |
| C(2S)-C(1S)-H(1S2)   | 110.6      |
| H(1S1)-C(1S)-H(1S2)  | 108.7      |
| C(2S)#1-C(2S)-C(1S)  | 101.1(2)   |
| C(2S)#1-C(2S)-H(2S1) | 111.5      |
| C(1S)-C(2S)-H(2S1)   | 111.5      |
| C(2S)#1-C(2S)-H(2S2) | 111.5      |
| C(1S)-C(2S)-H(2S2)   | 111.5      |
| H(2S1)-C(2S)-H(2S2)  | 109.4      |

---

Symmetry transformations used to generate equivalent atoms:  
#1 -x,y,-z+1/2

**Table S4.** Anisotropic displacement parameters ( $\text{Å}^2 \times 10^3$ ) for **5s-Mes-ZnCl<sub>2</sub>**. The anisotropic displacement factor exponent takes the form:  $-2 \pi^2 [h^2 a^{*2} U^{11} + \dots + 2 h k a^* b^* U_{12}]$

|       | U11   | U22   | U33   | U23    | U13   | U12   |
|-------|-------|-------|-------|--------|-------|-------|
| Zn(1) | 16(1) | 15(1) | 11(1) | 0(1)   | 3(1)  | 2(1)  |
| Cl(1) | 29(1) | 20(1) | 26(1) | 2(1)   | 14(1) | -2(1) |
| Cl(2) | 21(1) | 29(1) | 13(1) | 0(1)   | -1(1) | 2(1)  |
| N(1)  | 15(2) | 10(2) | 10(1) | -1(1)  | 3(1)  | 2(1)  |
| C(1)  | 7(2)  | 13(2) | 15(2) | 4(1)   | -1(1) | -3(1) |
| N(2)  | 16(2) | 12(2) | 7(1)  | 1(1)   | 3(1)  | 4(1)  |
| C(2)  | 21(2) | 17(2) | 12(2) | 1(1)   | 6(1)  | 8(2)  |
| C(3)  | 21(2) | 17(2) | 12(2) | -2(1)  | 5(1)  | 4(2)  |
| C(4)  | 15(2) | 10(2) | 10(1) | 2(1)   | 6(1)  | 4(2)  |
| C(5)  | 14(2) | 15(2) | 11(1) | 4(1)   | 5(1)  | 1(2)  |
| C(6)  | 22(2) | 18(2) | 12(2) | 0(1)   | 6(2)  | -4(2) |
| C(7)  | 23(2) | 16(2) | 11(2) | 1(1)   | 11(2) | -1(2) |
| C(8)  | 17(2) | 20(2) | 11(2) | 4(1)   | 4(1)  | 9(2)  |
| C(9)  | 14(2) | 15(2) | 9(2)  | -1(1)  | 3(1)  | 2(2)  |
| C(10) | 17(2) | 21(2) | 21(2) | 5(1)   | -1(2) | -5(2) |
| C(11) | 37(2) | 13(2) | 20(2) | -1(1)  | 5(2)  | 6(2)  |
| C(12) | 17(2) | 25(2) | 19(2) | -1(1)  | -2(2) | 5(2)  |
| C(13) | 18(2) | 9(2)  | 8(1)  | 1(1)   | 3(1)  | 3(2)  |
| C(14) | 14(2) | 10(2) | 15(2) | -5(1)  | 3(1)  | 2(2)  |
| C(15) | 21(2) | 12(2) | 14(2) | -1(1)  | 7(2)  | -3(2) |
| C(16) | 21(2) | 12(2) | 12(2) | -1(1)  | 4(2)  | 2(2)  |
| C(17) | 14(2) | 16(2) | 12(2) | -4(1)  | -1(1) | 3(2)  |
| C(18) | 17(2) | 8(2)  | 13(2) | -2(1)  | 9(1)  | 0(2)  |
| C(19) | 17(2) | 18(2) | 26(2) | -3(1)  | 4(2)  | 3(2)  |
| C(20) | 27(2) | 20(2) | 23(2) | 8(2)   | 2(2)  | 2(2)  |
| C(21) | 17(2) | 17(2) | 19(2) | 1(1)   | 5(1)  | 1(2)  |
| O(1)  | 12(1) | 13(1) | 18(1) | -3(1)  | 1(1)  | 1(1)  |
| C(22) | 12(2) | 19(2) | 30(2) | -2(2)  | -1(2) | 0(2)  |
| C(23) | 16(2) | 20(2) | 17(2) | -1(1)  | 5(1)  | 3(2)  |
| C(24) | 23(2) | 17(2) | 21(2) | -3(2)  | 2(2)  | 1(2)  |
| C(25) | 36(2) | 20(2) | 25(2) | -11(2) | -9(2) | 2(2)  |
| O(1S) | 29(2) | 10(2) | 51(2) | 0      | 5(2)  | 0     |
| C(1S) | 26(2) | 33(2) | 26(2) | 8(2)   | 10(2) | 6(2)  |
| C(2S) | 20(2) | 17(2) | 17(2) | -3(1)  | 2(2)  | 3(2)  |

**Table S5.** Hydrogen coordinates ( $\times 10^4$ ) and isotropic displacement parameters ( $\text{Å}^2 \times 10^3$ ) for **5s-Mes-ZnCl<sub>2</sub>**.

|        | x    | y     | z    | U(eq) |
|--------|------|-------|------|-------|
| H(2A)  | 1310 | 4310  | 4032 | 20    |
| H(2B)  | 800  | 3980  | 3613 | 20    |
| H(3A)  | 737  | 5729  | 3068 | 19    |
| H(3B)  | 1277 | 5951  | 3307 | 19    |
| H(6)   | 881  | 38    | 2291 | 20    |
| H(8)   | 2041 | 560   | 3900 | 19    |
| H(10A) | 481  | 2782  | 2274 | 29    |
| H(10B) | 345  | 1525  | 1992 | 29    |
| H(10C) | 636  | 2269  | 1393 | 29    |
| H(11A) | 1362 | -1450 | 3599 | 35    |
| H(11B) | 1868 | -1304 | 3344 | 35    |
| H(11C) | 1451 | -1494 | 2591 | 35    |
| H(12A) | 2165 | 3341  | 3512 | 31    |
| H(12B) | 2337 | 2365  | 4186 | 31    |
| H(12C) | 1934 | 3179  | 4395 | 31    |
| H(15)  | 1419 | 8125  | 524  | 18    |
| H(17)  | 145  | 6889  | 128  | 17    |
| H(19A) | 1802 | 6596  | 2356 | 30    |
| H(19B) | 1970 | 7406  | 1628 | 30    |
| H(19C) | 1975 | 6078  | 1492 | 30    |
| H(20A) | 473  | 9211  | -51  | 35    |
| H(20B) | 398  | 8357  | -860 | 35    |
| H(20C) | 885  | 8938  | -607 | 35    |
| H(21A) | -81  | 5342  | 900  | 26    |
| H(21B) | 208  | 5066  | 1825 | 26    |
| H(21C) | 307  | 4401  | 962  | 26    |
| H(22A) | 2323 | 2352  | 2056 | 25    |
| H(22B) | 2454 | 2293  | 1068 | 25    |
| H(23A) | 2386 | 495   | 2237 | 21    |
| H(23B) | 2683 | 547   | 1422 | 21    |
| H(24A) | 2126 | -379  | 603  | 25    |
| H(24B) | 1813 | -345  | 1394 | 25    |
| H(25A) | 1823 | 1210  | 0    | 33    |
| H(25B) | 1393 | 835   | 483  | 33    |
| H(1S1) | 43   | -982  | 1318 | 33    |
| H(1S2) | -472 | -732  | 1506 | 33    |
| H(2S1) | -492 | -2273 | 2389 | 22    |
| H(2S2) | -167 | -2739 | 1695 | 22    |

**Table S6.** Torsion angles [°] for **5s-Mes-ZnCl<sub>2</sub>**.

---

|                         |           |
|-------------------------|-----------|
| C(4)-N(1)-C(1)-N(2)     | 167.0(2)  |
| C(2)-N(1)-C(1)-N(2)     | 5.2(3)    |
| C(4)-N(1)-C(1)-Zn(1)    | -15.7(4)  |
| C(2)-N(1)-C(1)-Zn(1)    | -177.5(2) |
| O(1)-Zn(1)-C(1)-N(2)    | 168.7(2)  |
| Cl(2)-Zn(1)-C(1)-N(2)   | -77.9(2)  |
| Cl(1)-Zn(1)-C(1)-N(2)   | 58.5(3)   |
| O(1)-Zn(1)-C(1)-N(1)    | -8.1(3)   |
| Cl(2)-Zn(1)-C(1)-N(1)   | 105.3(3)  |
| Cl(1)-Zn(1)-C(1)-N(1)   | -118.4(2) |
| N(1)-C(1)-N(2)-C(13)    | -174.4(3) |
| Zn(1)-C(1)-N(2)-C(13)   | 8.1(4)    |
| N(1)-C(1)-N(2)-C(3)     | 3.4(3)    |
| Zn(1)-C(1)-N(2)-C(3)    | -174.0(2) |
| C(1)-N(1)-C(2)-C(3)     | -11.0(3)  |
| C(4)-N(1)-C(2)-C(3)     | -173.4(2) |
| C(1)-N(2)-C(3)-C(2)     | -10.0(3)  |
| C(13)-N(2)-C(3)-C(2)    | 168.0(3)  |
| N(1)-C(2)-C(3)-N(2)     | 11.6(3)   |
| C(1)-N(1)-C(4)-C(9)     | 119.3(3)  |
| C(2)-N(1)-C(4)-C(9)     | -80.2(3)  |
| C(1)-N(1)-C(4)-C(5)     | -62.2(4)  |
| C(2)-N(1)-C(4)-C(5)     | 98.2(3)   |
| C(9)-C(4)-C(5)-C(6)     | -5.1(4)   |
| N(1)-C(4)-C(5)-C(6)     | 176.5(2)  |
| C(9)-C(4)-C(5)-C(10)    | 174.1(3)  |
| N(1)-C(4)-C(5)-C(10)    | -4.3(4)   |
| C(4)-C(5)-C(6)-C(7)     | 3.0(4)    |
| C(10)-C(5)-C(6)-C(7)    | -176.2(3) |
| C(5)-C(6)-C(7)-C(8)     | 0.6(4)    |
| C(5)-C(6)-C(7)-C(11)    | 179.9(2)  |
| C(6)-C(7)-C(8)-C(9)     | -2.2(4)   |
| C(11)-C(7)-C(8)-C(9)    | 178.5(3)  |
| C(5)-C(4)-C(9)-C(8)     | 3.6(4)    |
| N(1)-C(4)-C(9)-C(8)     | -178.0(2) |
| C(5)-C(4)-C(9)-C(12)    | -177.3(3) |
| N(1)-C(4)-C(9)-C(12)    | 1.1(4)    |
| C(7)-C(8)-C(9)-C(4)     | 0.2(4)    |
| C(7)-C(8)-C(9)-C(12)    | -178.9(3) |
| C(1)-N(2)-C(13)-C(14)   | -94.8(3)  |
| C(3)-N(2)-C(13)-C(14)   | 87.5(3)   |
| C(1)-N(2)-C(13)-C(18)   | 90.2(4)   |
| C(3)-N(2)-C(13)-C(18)   | -87.5(3)  |
| C(18)-C(13)-C(14)-C(15) | 0.7(4)    |
| N(2)-C(13)-C(14)-C(15)  | -174.1(2) |
| C(18)-C(13)-C(14)-C(19) | -179.8(3) |
| N(2)-C(13)-C(14)-C(19)  | 5.4(4)    |
| C(13)-C(14)-C(15)-C(16) | 0.9(4)    |
| C(19)-C(14)-C(15)-C(16) | -178.5(3) |
| C(14)-C(15)-C(16)-C(17) | -1.9(4)   |
| C(14)-C(15)-C(16)-C(20) | 175.9(3)  |
| C(15)-C(16)-C(17)-C(18) | 1.3(4)    |
| C(20)-C(16)-C(17)-C(18) | -176.6(3) |

|                           |             |
|---------------------------|-------------|
| C(16)-C(17)-C(18)-C(13)   | 0.3(4)      |
| C(16)-C(17)-C(18)-C(21)   | -179.4(2)   |
| C(14)-C(13)-C(18)-C(17)   | -1.3(4)     |
| N(2)-C(13)-C(18)-C(17)    | 173.6(2)    |
| C(14)-C(13)-C(18)-C(21)   | 178.4(2)    |
| N(2)-C(13)-C(18)-C(21)    | -6.7(4)     |
| C(1)-Zn(1)-O(1)-C(25)     | 139.2(2)    |
| Cl(2)-Zn(1)-O(1)-C(25)    | 17.4(2)     |
| Cl(1)-Zn(1)-O(1)-C(25)    | -97.8(2)    |
| C(1)-Zn(1)-O(1)-C(22)     | -83.8(2)    |
| Cl(2)-Zn(1)-O(1)-C(22)    | 154.33(18)  |
| Cl(1)-Zn(1)-O(1)-C(22)    | 39.21(19)   |
| C(25)-O(1)-C(22)-C(23)    | -37.0(3)    |
| Zn(1)-O(1)-C(22)-C(23)    | 179.70(16)  |
| O(1)-C(22)-C(23)-C(24)    | 19.5(3)     |
| C(22)-C(23)-C(24)-C(25)   | 4.2(3)      |
| C(22)-O(1)-C(25)-C(24)    | 39.8(3)     |
| Zn(1)-O(1)-C(25)-C(24)    | -177.52(18) |
| C(23)-C(24)-C(25)-O(1)    | -26.5(3)    |
| C(1S)#1-O(1S)-C(1S)-C(2S) | 13.16(15)   |
| O(1S)-C(1S)-C(2S)-C(2S)#1 | -33.8(3)    |

---

Symmetry transformations used to generate equivalent atoms:

#1 -x,y,-z+1/2
